# Supplementary material for: Synergistic Activity and Mechanism of Sanguinarine with Polymyxin B against Gram-Negative Bacterial Infections
Source: MDPI journal article supplement (doi:10.3390/pharmaceutics16010070), 2024-01-03
Supplement: s1 [file s1]

## Supplementary Information

**Figure S1.** *In vivo* antibacterial activity of PMB-SA combination in murine peritonitis model. **a** The fold changes of white pulp area in spleens. **b** Leukocyte and neutrophil count in blood (n = 5) **c** Assays of proinflammatory cytokines IL-6, IL-1 $\beta$  and TNF- $\alpha$  in livers, kidneys and spleens by RT-qPCR (n = 5). All data were expressed as mean  $\pm$  SD (error bars). \* $P < 0.05$ , \*\* $P < 0.01$ , \*\*\* $P < 0.001$ , \*\*\*\* $P < 0.0001$ . The survival rate was analyzed by a log-rank (Mantel-Cox) test. Welch's one-way ANOVA with Dunnett's T3 multiple comparison test were used for analysis.

**Figure S2.** Dot-plot profiles of the bacterial membrane permeability assay. The Ctrl-v group represented the viable control with untreated bacteria. The Ctrl-d group represented the dead control with bacteria killed by heating. The quadrant I and II were designated based on the dot-plot profiles of Ctrl-v and Ctrl-d respectively.

**Figure S3.** Metabolomic analysis of *E. coli* treated with PMB and SA for 1h. **a** Principal component analysis (PCA) plots for metabolite levels from *E. coli* ATCC 25922 significantly impacted by PMB (2  $\times$  MIC), SA (2  $\times$  MIC), and their combination. **b** Venn diagrams exhibiting the number of metabolites significantly affected in each group ( $P \leq 0.05$ ). **c** Changing numbers of significant metabolites in different groups, including lipids, nucleosides, amino acids, carbohydrates and so on. ( $P \leq 0.05$ ). **d** Integrated pathway map of metabolites in *E. coli* ATCC 25922 significantly impacted by PMB, SA, and their combination in pathways of oxidative phosphorylation and pantothenate and coenzyme A biosynthesis. Bar charts for the significantly impacted metabolites of these pathways following PMB (2  $\times$  MIC), SA (2  $\times$  MIC) or their combination at 1 h ( $P < 0.05$ ). **e** Heat map profiles of relative abundance of significantly perturbed metabolites in DNA and RNA metabolism, including purine metabolism (hypoxanthine, adenine and guanine) and pyrimidine metabolism (uracil, thymine and cytosine) ( $P \leq 0.05$ ), \* $P < 0.05$ , \*\* $P < 0.01$ , \*\*\* $P < 0.001$ , \*\*\*\* $P < 0.0001$ . All data were obtained from six replicates (n = 6), and were expressed as mean  $\pm$  SD (error bars). Student's t-test was used to analyze.
