# Supplementary material for: Synergistic Activity and Mechanism of Sanguinarine with Polymyxin B against Gram-Negative Bacterial Infections
Source: MDPI journal article supplement (doi:10.3390/pharmaceutics16010070), 2024-01-03
Supplement: s1 [file s1]

Table S1 Sequence of primers used for RT-qPCR in *in vivo* study

| Gene          | Forward primer (5'-3') | Reverse primer (5'-3') |
|---------------|------------------------|------------------------|
| TNF- $\alpha$ | CACAGAAAGCATGATCCGCG   | ACTGATGAGAGGGAGGCCAT   |
| IL-1 $\beta$  | ACTCATTGTGGCTGTGGAGA   | TTGTTTCATCTCGGAGCCTGT  |
| IL-6          | CACTTCACAAGTCGGAGGCT   | AATGAATGGACGCCCACACT   |
| GAPDH         | CTCCCACTCTTCCACCTTCG   | TAGGGCCTCTCTTGCTCAGT   |
