# Supplementary material for: Synergistic Activity and Mechanism of Sanguinarine with Polymyxin B against Gram-Negative Bacterial Infections
Source: Pharmaceutics. 2024 Jan 3;16(1):70. doi: 10.3390/pharmaceutics16010070 (PMC10820148; doi:10.3390/pharmaceutics16010070)
Supplement: Supplementary file 1 [file pharmaceutics-16-00070-s001.zip]

Archive with 5 entries (5 files):
- Figure S1.tif
- Figure S2.tif
- Figure S3.tif
- Supplementary Information.pdf
- Table S1.pdf
